# Supplementary material
Source: PubMed Central journal article supplement (PMC3413922)
Supplement: NIHMS364133-supplement-1_si_001.pdf [file NIHMS364133-supplement-1_si_001.pdf]

## Bi-Directional Ion Emission from Massive Gold Cluster Impacts on Nanometric Carbon Foils

J. Daniel DeBord<sup>†</sup>, Serge Della-Negra<sup>‡</sup>, Francisco A. Fernandez-Lima<sup>†</sup>, Stanislav V. Verkhoturov<sup>†</sup>, Emile A. Schweikert<sup>†,\*</sup>

<sup>†</sup> Department of Chemistry, Texas A&M University, College Station, Texas 77943-3144

<sup>‡</sup> Institut de Physique Nucléaire d'Orsay, Université Paris-Sud 11, CNRS/IN2P3, F-91406 Orsay, France

\* Corresponding author. Tel: 979.845.2341, Fax: 979.845.1655  
E-mail: schweikert@chem.tamu.edu

**Manuscript ID: jp-2011-12126m**

Complete Reference (17) showing all authors.

(17) Srama, R.; Woiwode, W.; Postberg, F.; Armes, S. P.; Fujii, S.; Dupin, D.; Ormond-Prout, J.; Sternovsky, Z.; Kempf, S.; Moragas-Klostermeyer, G.; Mocker, A.; Grün, E. *Rapid Commun. Mass Spectrom.* **2009**, *23*, 3895-3906.
